# Glycosylphosphatidylinositol-Specific Phospholipase D in Nonalcoholic Fatty Liver Disease: A Preliminary Study

Naga Chalasani, Raj Vuppalanchi, Nandita S. Raikwar, and Mark A. Deeg

Departments of Medicine (N.C., R.V., N.S.R., M.A.D.) and Biochemistry and Molecular Biology (M.A.D.), Indiana University School of Medicine and Department of Veterans Affairs (M.A.D.), Indianapolis, Indiana 46202

**Context:** Recent studies demonstrated that *de novo* lipogenesis is increased in patients with nonalcoholic fatty liver disease (NAFLD). Patients with NAFLD also have plasma lipid abnormalities. These lipid abnormalities may in part be related to insulin resistance, which is common in patients with NAFLD. Insulin resistance is associated with alterations in proteins involved in lipid metabolism including glycosylphosphatidylinositol-specific phospholipase D (GPI-PLD), which is involved in triglyceride metabolism.

**Objective:** The objective of the study was to determine whether alterations in serum and hepatic levels of GPI-PLD occur in patients with NAFLD.

**Design and Patients:** We examined the following: 1) levels of serum GPI-PLD in nondiabetics with nonalcoholic steatohepatitis, compared with matched controls; 2) hepatic expression of GPI-PLD mRNA in patients with normal liver or NAFLD; and 3) effect of overexpressing GPI-PLD *vs.*  $\beta$ -galactosidase (control) on global gene expression in a human hepatoma cell line.

**Results:** The serum levels of GPI-PLD were significantly higher in patients with nonalcoholic steatohepatitis than in matched controls ( $119 \pm 24$  *vs.*  $105 \pm 15$   $\mu\text{g/ml}$ ,  $P = 0.047$ ). The hepatic expression of GPI-PLD mRNA was increased nearly 3-fold in NAFLD patients, compared with patients with normal liver ( $3.1 \pm 2.6$  *vs.*  $1.1 \pm 1.0$  arbitrary units per microgram total RNA,  $P = 0.026$ ). Finally, overexpressing GPI-PLD was associated with an increase in *de novo* lipogenesis genes.

**Conclusions:** Patients with NAFLD have elevated serum levels and hepatic expression of GPI-PLD, and its overexpression *in vitro* is associated with increased expression of *de novo* lipogenesis genes. These results suggest that GPI-PLD may play a role in the pathogenesis of NAFLD and/or its metabolic features and warrants further investigation. (*J Clin Endocrinol Metab* 91: 2279–2285, 2006)

NONALCOHOLIC FATTY LIVER disease (NAFLD) is the leading cause of abnormal liver functions in Western society. Histologically, NAFLD can range from fatty liver to nonalcoholic steatohepatitis (NASH) to cirrhosis and is associated with altered lipid metabolism both in the liver and plasma compartment (1, 2). Hepatic *de novo* lipogenesis is significantly increased in patients with NAFLD (3). Patients with NAFLD also have elevations in serum triglycerides and lower levels of high-density lipoproteins. The etiology of these lipid abnormalities may in part be related to insulin resistance, which is common in patients with NAFLD (4). Insulin resistance is associated with alterations in proteins involved in lipid metabolism including glycosylphosphatidylinositol-specific phospholipase D (GPI-PLD) (5).

GPI-PLD is an 815-amino acid protein expressed in numerous tissues and cells (6, 7). Liver has the highest level of GPI-PLD expression and is the primary organ contributing

to GPI-PLD in the serum. GPI-PLD is abundant in serum (approximately 100  $\mu\text{g}$  protein per milliliter) in which it associates with apolipoproteins AI and AIV (8–10). Increased serum GPI-PLD is associated with insulin resistance and elevated serum triglycerides (5), and overexpressing hepatic GPI-PLD in mice is associated with increases in fasting and postprandial triglycerides (11). This effect of GPI-PLD is mediated, at least in part, by reducing the catabolism of triglyceride-rich lipoproteins. Because patients with NAFLD frequently have insulin resistance and fasting and postprandial hypertriglyceridemia (4, 12), we hypothesized that subjects with NAFLD may have abnormal hepatic and serum levels of GPI-PLD as a contributor to the altered intra- and extrahepatic lipid metabolism.

To characterize GPI-PLD in patients with NAFLD, we conducted a study with three aims. First, we compared the serum levels of GPI-PLD in nondiabetic patients with NASH to age, gender, body mass index (BMI), and body fat-matched controls. Second, we measured the hepatic expression of GPI-PLD mRNA in patients with simple fatty liver and NASH, compared with normal hepatic histology. Third, to determine whether GPI-PLD may play a role in hepatic lipid metabolism, we examined the effect of overexpressing GPI-PLD *vs.*  $\beta$ -galactosidase (control) on global gene expression in a human hepatoma cell line (HepG2). We found that serum levels and hepatic GPI-PLD mRNA levels are significantly higher in patients with NAFLD. In addition, overexpression of GPI-PLD in HepG2 cells is associated with increases in *de novo* lipogenesis genes, suggesting that GPI-PLD

## First Published Online April 4, 2006

Abbreviations: ACC, Acetyl coenzyme A carboxylase; ACLY, ATP citrate lyase; AdGPI-PLD, adenovirus expressing GPI-PLD; BMI, body mass index; DGAT, diacylglycerol acyltransferase; GPI-PLD, glycosylphosphatidylinositol-specific phospholipase D; HADH, L-3-hydroxyacyl-coenzyme A dehydrogenase; HOMA, homeostasis model assessment; LDL, low-density lipoprotein; NAFLD, nonalcoholic fatty liver disease; NASH, nonalcoholic steatohepatitis; SCD, stearoyl coenzyme-A desaturase; SREBP, sterol-response element binding protein.

JCEM is published monthly by The Endocrine Society (<http://www.endo-society.org>), the foremost professional society serving the endocrine community.

may have a role in the altered fatty acid and lipid metabolism in NAFLD.

## Patients and Methods

### Aim 1

Serum GPI-PLD levels were measured in 21 nondiabetic individuals with biopsy-proven NASH and 19 age-, gender-, BMI-, and body fat-matched nondiabetic individuals without liver disease. This cohort was studied previously, and it served as the basis for several papers related to NASH published by our group (13–17). These studies were conducted after these publications and in accordance with the guidelines in the Declaration of Helsinki. All patients provided informed consent to participate in these studies, all of which were approved by the Institutional Review Board and the Advisory Committee for the General Clinical Research Center of Indiana University School of Medicine. Fasting serum GPI-PLD levels were measured by ELISA from stored serum specimens (–80 C).

The details of clinical and histological criteria used to characterize the subjects with NASH and the controls in this cohort have been described previously (13–17). The anthropometric measurements available on this cohort of patients included height, weight, waist to hip ratio, body composition (measured by BODPOD method), and abdominal fat measurements (measured by single-slice computed tomography abdomen). Serum studies available for this analysis included liver biochemistries, fasting serum lipids, oxidized low-density lipoprotein (LDL), insulin, glucose, free fatty acids, leptin, and adiponectin. Insulin resistance was assessed by the homeostasis model assessment (HOMA) method, and individuals with HOMA greater than 3.5 were considered to have insulin resistance (18). Insulin resistance measured by HOMA correlates closely with euglycemic clamp techniques within our patient population, and in a previous study from this institution, HOMA greater than 3.5 was an accurate indicator of insulin resistance (18). The assay methods for these serum studies are described in previous publications (13–17).

### Aim 2

The GPI-PLD mRNA was measured from the cell lysate of liver biopsy material of 13 subjects with NASH, 12 subjects with nonalcoholic steatosis, and 12 subjects with normal liver tissue (who had liver biopsies performed as part of donor evaluation for living related liver transplantation). These liver samples were obtained in the fasting state and collected as part of an institutional review board-approved protocol that allowed us to maintain a liver tissue bank. The majority of these liver samples were also used previously (13, 17). Serum samples were not available from this cohort. These subjects were not part of the cohort studied to address our first aim.

Total RNA was extracted and isolated from the core biopsy specimen using a RNeasy minikit (QIAGEN, Valencia, CA). DNase treatment was done by using DNA-free (Ambion, Austin, TX) to remove contaminating DNA in the extracted total RNA. Agilent 2100 bioanalyzer (Agilent Technologies, Palo Alto, CA) combined with the RNA 6000 Nano Lab-Chip kit (Caliper Technologies Corp., Hopkinton, MA) was used to analyze the quality (28S to 18S ratio) and quantity of total RNA. RNA was stored at –80 C until used.

TaqMan real-time quantitative RT-PCR was used to quantitate GPI-PLD mRNA. The following sets of the primers and probes were designed using the Primer Express software (Applied Biosystems, Foster City, CA) to function according to the Taqman technology. GPI-PLD-specific primers and probes used for QPCR were: HumGPI-PLD forward, 5'-CCCAGCCTGAGCAACAAAG-3', HumGPI-PLD reverse, 5'-TTC-CTCGCCTCTCACCGTC-3', and HumGPI-PLD probe, 5'-FAM-AACTGAACCTGGAGGCGGCCAAC-TEMRA-3' synthesized from Integrated DNA Technologies (Coralville, IA). The amplicon was 720 bp and was verified by agarose gel electrophoresis. The RT-PCRs were performed in a Mx4000 multiplex quantitative PCR system (Stratagene, La Jolla, CA) using Brilliant Plus single-step quantitative RT-PCR core reagent kit (Stratagene) in a total reaction volume of 25  $\mu$ l. The reaction contained 5 U StrataScript reverse transcriptase, 1.25 U SureStart Taq DNA polymerase, 0.2 mM GAUC mix, 5 mM MgCl<sub>2</sub>, and 0.3  $\mu$ M of each primer and probe for GPI-PLD. dNTP cycling conditions were as fol-

lows: 1 cycle for 90 min at 45 C, 1 cycle for 10 min at 95 C followed by 40 cycles of 15 sec denaturation at 95 C, and a 1-min annealing/extension at 55 C. Standard curves were generated for GPI-PLD from serial dilutions of human fetal liver total RNA (BD Biosciences CLONTECH, San Diego, CA). Unknown sample values were determined from standard curves, and data were expressed as arbitrary units normalized to total RNA as determined by Ribogreen (Molecular Probes, Portland, OR).

### Aim 3

HepG2 cells, a human hepatoma cell line, were obtained from the American Type Culture Collection (Manassas, VA). Cells were maintained in DMEM (GIBCO-BRL, Carlsbad, CA) supplemented with 10% fetal bovine serum, penicillin (100 U/ml), and streptomycin (100  $\mu$ g/ml) and maintained at 37 C in a humidified atmosphere (5% CO<sub>2</sub>). For experiments, HepG2 cells were seeded in 100-mm culture plates (2.2  $\times$  10<sup>6</sup> cells/plate) 2 d before viral transduction. Cells were transduced with recombinant adenovirus AdCMVGPI-PLD (AdGPI-PLD) or AdCMV- $\beta$ -galactosidase (AdLacZ) (control) (19) with a multiplicity of infection of 0.56. Five hours after the addition of the virus, the media were switched to low-glucose DMEM supplemented with fatty-acid free BSA (1 mg/ml). The cells were harvested 6 and 12 h after viral transduction, and the total RNA was extracted using TriPure (Roche Diagnostics, Indianapolis, IN) followed by further purification with Absolutely RNA miniprep kit (Stratagene) and stored at –80 C until used for microarray analysis or Northern blotting. Four independent culture plates were used for each condition for a total of 16 microarrays.

The microarray procedure was done by the Indiana University Center for Medical Genomics following standard Affymetrix protocols (Affymetrix GeneChip expression analysis technical manual; Affymetrix, Santa Clara, CA). cRNA was hybridized to human genome U133A GeneChips for 17 h, followed by standard washing, staining, and scanning. Data were extracted using Affymetrix MicroArray Suite 5.0 software (MAS5; Affymetrix MicroArray Suite 5.0 user's guide, Santa Clara, CA). To confirm microarray observations, Northern blot analysis was performed on diacylglycerol acyltransferase (DGAT) 1 and DGAT2.

Northern blot analysis was performed to identify mRNA specific to DGAT1 and DGAT2. DGAT1- and DGAT2-specific probes were generated by PCR amplification from human liver QUICK-clone cDNA (BD Biosciences, San Diego, CA) using gene-specific primers. The primers used were: DGAT1 forward, 5'-CTTCTGCTGCGACGGATCCTT-GAGATGCT-3'; DGAT1 reverse, 5'-CTATTGGCTGTCGGATGAT-GAGCGACAGC-3'; DGAT2 forward, 5'-AGAGGCCACAGAAGT-GAGCAAGAAG-3'; and DGAT2 reverse, 5'-CCCCAGGTGTCGGAGG-AGAAGAGGCCTCGACCA-3'. The PCRs were performed in a total volume of 50  $\mu$ l containing 250 nM each of dCTP, dGTP, dATP, and dTTP, 250 nM forward and reverse primers and Advantage cDNA polymerase mix (BD Biosciences CLONTECH). Cycling conditions were as follows: 1 cycle of 5 min at 94 C for initial denaturation followed by 30 cycles of 1 min denaturation at 94 C, 1 min annealing at 58 C, and 2 min of extension at 72 C. PCR products were run on agarose gel and purified by QLA quick gel extraction kit (QIAGEN). Purified PCR products were cloned into pCR2.1-TOPO vector (Invitrogen, Carlsbad, CA) as per the manufacturer's protocol and were verified by sequencing (Biochemistry and Biotechnology Core Facilities, Indiana University, Indianapolis, IN). Probes for Northern blot analysis were generated using DECAprime TM II kit (Ambion) as per the manufacturer's instructions. Gene-specific bands were quantified using a PhosphorImager (Molecular Dynamics, Sunnyvale, CA) and normalized to  $\beta$ -actin.

### Statistical analysis

Statistical analyses were performed using StatView software (SAS Institute Inc., Cary, NC). Depending on the data distribution, comparisons were made between the two groups using the Student's *t* test or Mann-Whitney test. The association between continuous variables was tested using Spearman rank correlation. Data are presented as mean  $\pm$  SD. *P* < 0.05 was considered statistically significant.

Microarray analyses were carried out using Microarray Data Portal, a proprietary analytical and informatics tool developed by the Center for Medical Genomics. To eliminate noisy data from probe sets that reflect background signals, we analyzed only those probe sets called present by MAS5 in at least half of the arrays for at least one of the conditions (20).

**TABLE 1.** Demographic, anthropometric, and biochemical measurements in NASH and control groups<sup>a</sup>

|                             | NASH<br>(n = 21) | Controls<br>(n = 19) | P value |
|-----------------------------|------------------|----------------------|---------|
| Age, yr                     | 41 ± 13          | 43 ± 14              | 0.6     |
| Females, n                  | 11               | 10                   | 0.9     |
| BMI, kg/m <sup>2</sup>      | 33 ± 4.5         | 31 ± 4               | 0.15    |
| Waist to hip ratio          | 0.95 ± 0.06      | 0.95 ± 0.05          | 0.8     |
| Total body fat, %           | 40 ± 8           | 39 ± 10              | 0.3     |
| Visceral fat, %             | 28 ± 12          | 22 ± 13              | 0.02    |
| Fasting lipids              |                  |                      |         |
| Triglycerides, mmol/liter   | 3.53 ± 1.31      | 2.53 ± 1.15          | 0.01    |
| Cholesterol, mmol/liter     | 5.35 ± 0.93      | 5.38 ± 1.29          | 0.9     |
| HDL cholesterol, mmol/liter | 0.93 ± 0.16      | 1.22 ± 0.36          | 0.003   |
| LDL cholesterol, mmol/liter | 3.49 ± 0.67      | 3.39 ± 1.06          | 0.7     |
| Serum glucose, mmol/liter   | 5.16 ± 0.72      | 5.05 ± 0.61          | 0.2     |
| Serum insulin, pmol/liter   | 170 ± 119        | 92 ± 68              | <0.001  |
| Serum C-peptide, mg/liter   | 6.0 ± 5.9        | 4.3 ± 3.6            | 0.3     |
| HOMA                        | 7 ± 5.4          | 3.2 ± 3.0            | <0.001  |
| AST, IU/liter               | 75 ± 56          | 26 ± 12              | <0.001  |
| ALT, IU/liter               | 99 ± 77          | 27 ± 8               | <0.001  |
| Leptin, ng/ml               | 22 ± 14          | 16 ± 10              | 0.3     |
| Adiponectin, μg/ml          | 4.9 ± 2.7        | 7.3 ± 3.5            | 0.02    |
| Oxidized LDL, U/liter       | 56 ± 16          | 40 ± 12              | <0.001  |
| GPI-PLD, μg/ml              | 119 ± 24         | 105 ± 15             | 0.047   |

HDL, High-density lipoprotein; AST, aspartate aminotransferase; ALT, alanine aminotransferase.

<sup>a</sup> Data represent mean ± SD unless specified otherwise.

Then we carried out an ANOVA with one factor for the gene transduced (GPI-PLD *vs.* LacZ) using log-transformed signal values. Multifactor ANOVA was carried out for the gene transduced, one for time, and their interaction. Genes that were significant for the gene transduced or their interaction at  $P \leq 0.05$  were mapped onto Gene Ontology categories.

## Results

### Aim 1

The demographic, anthropometric, and serological characteristics of individuals with NASH and their controls are shown in Table 1. These results have been published previously (13–17) but are presented here again for the interpretation of the GPI-PLD levels. There were no demographic differences between the groups, and all participants were Caucasian. BMI, percent body fat, and waist to hip ratio were similar between the groups, but patients with NASH had significantly greater visceral fat mass than the controls (Table 1). As expected, subjects with NASH had higher fasting levels of insulin and HOMA values than the controls.

Serum GPI-PLD levels in patients with NASH were  $119 \pm 24$  μg/ml and were significantly higher than the controls ( $105 \pm 15$  μg/ml,  $P = 0.047$ ). There were no gender-specific differences in serum GPI-PLD levels in the total cohort (males  $113 \pm 16$  *vs.* females  $112 \pm 26$  mg/ml,  $P = 0.4$ ). There was no statistically significant relationship between serum GPI-PLD levels and body weight, BMI, waist to hip ratio, percent body fat, percent visceral fat, or visceral fat mass. Serum GPI-PLD had a statistically significant negative correlation with age ( $r = -0.45$ ,  $P = 0.006$ ) as has been observed previously (21).

### Aim 2

Hepatic GPI-PLD mRNA did not differ between patients with fatty liver or NASH; hence, the results from these two groups were combined (data not shown). Hepatic GPI-PLD

mRNA was 3-fold higher in the combined group (NAFLD), compared with normal liver tissue (Fig. 1).

These results demonstrate that NAFLD is associated with elevations in liver expression of GPI-PLD mRNA. However, these results do not distinguish whether increases in hepatic GPI-PLD expression are an epiphenomenon or may play a direct role in the pathogenesis of fatty liver or NASH.

### Aim 3

To determine whether increased GPI-PLD expression may play an active role altering hepatic fatty acid and triglyceride metabolism, we overexpressed GPI-PLD in HepG2 cells, a human hepatoma cell line, and examined the effect on global gene expression. HepG2 cells were transduced with a control adenovirus expressing β-galactosidase (AdLacZ) or an adenovirus expressing GPI-PLD (AdGPI-PLD), and global gene

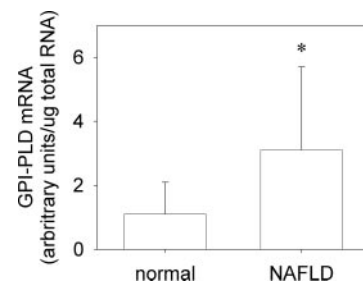

**FIG. 1.** Liver GPI-PLD mRNA expression is significantly increased in patients with NAFLD. Liver tissue was obtained from healthy volunteers ( $n = 12$ ) undergoing liver biopsies as part of live liver donor evaluation or patients with NAFLD ( $n = 25$ ) undergoing liver biopsy as part of their clinical care. The mean age was  $41 \pm 5$  yr in the normal group and  $39 \pm 8$  yr in the NAFLD group. The BMI was significantly higher in the NAFLD group ( $32 \pm 3.5$  kg/m<sup>2</sup>), compared with the normal group ( $24 \pm 3.2$ ). Liver GPI-PLD mRNA was determined by real-time PCR as described in *Patients and Methods*. \*,  $P = 0.026$  by *t* test.



**TABLE 2.** Gene ontology analysis of GPI-PLD-dependent gene expression

| Ontology name      | Gene ontology name                                  | No. of genes | <i>P</i> value |
|--------------------|-----------------------------------------------------|--------------|----------------|
| Cellular component | Intracellular                                       | 249          | 1.1 E-5        |
|                    | Chromosome                                          | 11           | 1.1E-4         |
|                    | Chromatin                                           | 10           | 3.1E-4         |
|                    | Nucleoplasm                                         | 16           | 0.012          |
|                    | Cytoplasm                                           | 124          | 0.025          |
| Molecular function | Nuclear mRNA splicing via spliceosome               | 15           | 4.9E-4         |
|                    | Positive regulation of transcription, DNA dependent | 7            | 0.002          |
|                    | RNA binding                                         | 34           | 0.002          |
|                    | Chromatin modification                              | 10           | 0.006          |
|                    | Transcription factor binding                        | 20           | 0.006          |
|                    | Transcription coactivator activity                  | 13           | 0.008          |
| Biological process | Metabolism                                          | 234          | 0.003          |
|                    | Aromatic compound catabolism                        | 2            | 0.005          |
|                    | Polypyrimidine tract binding                        | 2            | 0.012          |
|                    | Peptidyl-serine phosphorylation                     | 2            | 0.015          |
|                    | Protein amino acid autophosphorylation              | 3            | 0.016          |

Genes that were significant for gene transduced at  $P \leq 0.05$  were mapped onto gene ontology categories. The five gene ontologies with the lowest *P* value for cellular component, molecular function, and biological process are listed.

expression was determined using microarrays after 6 or 12 h. A total of 10,435 genes (47% of total gene probe set) were detected. Of these probe sets, 2340 differed at  $P < 0.05$  (522 randomly expected) and 1270 genes at  $P < 0.01$  (104 randomly expected).

Using a multifactor ANOVA, there were 2159 genes that were significantly different ( $P < 0.05$ ) at 12 h, compared with 6 h, but were unrelated to the overexpression of GPI-PLD. Hence, the expression of these genes is related to time and/or cell cycle *per se* and was not analyzed further. Four hundred forty-one genes were significantly ( $P < 0.05$ ) affected only by the overexpression of GPI-PLD independent of time. There were 773 genes that changed in a time- and GPI-PLD-dependent fashion. Analysis of the function of these genes using gene ontology demonstrated that the majority of these genes were intracellular and involved in metabolism (Tables 2 and 3). The molecular function of these genes varied. The highest numbers of genes are involved in RNA metabolism and regulation of transcription. Numerous genes involved in signal transduction including the MAPK pathway and cAMP

signaling pathway were also altered with GPI-PLD overexpression. This manuscript will focus on the effect of GPI-PLD on lipid metabolism.

There were 32 genes involved in fatty acid and lipid metabolism that were affected by overexpressing GPI-PLD (Table 4). These genes are involved in *de novo* lipogenesis, triglyceride synthesis, and lipoprotein metabolism. The largest effect was on DGAT. DGAT1 increased nearly 3-fold with overexpressing GPI-PLD. To confirm the microarray results, Northern blot analysis of both isoforms of DGAT, DGAT1 and DGAT2, was performed. This confirmed that GPI-PLD overexpression increased DGAT1 but not DGAT2 mRNA levels (Fig. 2).

## Discussion

The accumulation of triglycerides in liver results from an imbalance between the uptake of fatty acids, *de novo* lipogenesis, and export as very low-density lipoproteins or fatty acid oxidation. Numerous biochemical and hormonal defects

**TABLE 3.** Gene ontology analysis of time- and GPI-PLD-dependent gene expression

| Ontology name      | Gene ontology name                                                                     | No. of genes | <i>P</i> value |
|--------------------|----------------------------------------------------------------------------------------|--------------|----------------|
| Cellular component | Chromosome                                                                             | 21           | 4.0E-8         |
|                    | Intracellular                                                                          | 423          | 1.2 E-6        |
|                    | Chromatin                                                                              | 16           | 2.1E-5         |
|                    | Ribonucleoprotein complex                                                              | 39           | 6.3E-5         |
|                    | Mitochondrion                                                                          | 47           | 1.6E-4         |
| Molecular function | RNA binding                                                                            | 57           | 3.5E-4         |
|                    | Nuclear mRNA splicing via spliceosome                                                  | 20           | 0.002          |
|                    | Nucleosome disassembly                                                                 | 4            | 0.003          |
|                    | Structural constituent of ribosome                                                     | 20           | 0.003          |
|                    | Protein targeting to mitochondrion                                                     | 5            | 0.006          |
|                    | Transcription coactivator activity                                                     | 13           | 0.007          |
| Biological process | RNA metabolism                                                                         | 57           | 7.7E-4         |
|                    | Metabolism                                                                             | 401          | 0.001          |
|                    | Electron transport activity                                                            | 23           | 0.005          |
|                    | RNA catabolism                                                                         | 7            | 0.005          |
|                    | Oxidoreductase activity, acting on the CH-OH group of donors, NAD, or NADP as acceptor | 11           | 0.006          |

Genes that were significant for gene transduced/time interaction at  $P \leq 0.05$  were mapped onto gene ontology categories. The five gene ontologies with the lowest *P* value for cellular component, molecular function, and biological process are listed. CH-OH, Alcohol; NAD, nicotinamide adenine dinucleotide; NADP, NAD phosphate.

**TABLE 4.** Effect of GPI-PLD overexpression on lipid gene expression

| Gene symbol | Name                                                                                                                                     | GenBank     | Multifactor ANOVA | GPI-PLD <i>vs.</i> control fold change |      |
|-------------|------------------------------------------------------------------------------------------------------------------------------------------|-------------|-------------------|----------------------------------------|------|
|             |                                                                                                                                          |             |                   | 6 h                                    | 12 h |
| DGAT1       | Diacylglycerol <i>O</i> -acyltransferase homolog 1                                                                                       | AA978141    | 0.001             | 2.94                                   | 0.97 |
| PCCB        | Propionyl coenzyme A carboxylase, $\beta$ -polypeptide                                                                                   | R15273      | 0.006             | 1.28                                   | 0.88 |
| CLU         | Apolipoprotein J                                                                                                                         | M25915.1    | 0.022             | 1.25                                   | 0.80 |
| FDXR        | Ferredoxin reductase                                                                                                                     | AI004037    | 0.041             | 1.23                                   | 0.87 |
| SCD         | Stearoyl coenzyme-A desaturase                                                                                                           | AA678241    | 0.004             | 1.23                                   | 0.87 |
| LYPLA2      | Lysophospholipase II                                                                                                                     | AL031295    | 0.040             | 1.22                                   | 1.17 |
| NR1H4       | Bile acid receptor (Farnesoid X-activated receptor)                                                                                      | NM_005123.1 | 0.026             | 1.20                                   | 0.90 |
| ELOVL1      | Elongation of very long chain fatty acids protein 1                                                                                      | H93026      | 0.050             | 1.19                                   | 0.93 |
| AZGP1       | $\alpha$ 2-Glycoprotein 1, zinc                                                                                                          | AC004522    | 0.024             | 1.18                                   | 0.80 |
| APOC3       | Apolipoprotein CIII                                                                                                                      | AA909307    | 0.020             | 1.15                                   | 0.84 |
| ZAP128      | Peroxisomal acyl-coenzyme A thioester hydrolase 2a                                                                                       | NM_006821.1 | 0.009             | 1.15                                   | 0.84 |
| SCARB1      | Scavenger receptor class B type 1                                                                                                        | NM_005505.1 | 0.036             | 1.15                                   | 0.96 |
| CDS2        | CDP-diacylglycerol synthase (phosphatidate cytidylyltransferase) 2                                                                       | AL568982    | 0.004             | 1.14                                   | 0.89 |
| HADHSC      | L-3-hydroxyacyl-coenzyme A dehydrogenase, short chain                                                                                    | AA902926    | 0.031             | 1.13                                   | 0.83 |
| CD74        | CD74 antigen                                                                                                                             | K01144.1    | 0.026             | 1.12                                   | 0.89 |
| HADHA       | Hydroxyacyl-coenzyme A dehydrogenase/3-ketoacyl-coenzyme A thiolase/enoyl-coenzyme A hydratase (trifunctional protein), $\alpha$ subunit | AA954955    | 0.027             | 1.11                                   | 0.89 |
| ACACB       | Acetyl-coenzyme A carboxylase $\beta$                                                                                                    | AI057637    | 0.017             | 1.10                                   | 0.86 |
| PPP2R1B     | Protein phosphatase 2 (formerly 2A), regulatory subunit A (PR 65), $\beta$ -isoform                                                      | T79584      | 0.004             | 1.08                                   | 0.80 |
| ACLY        | ATP citrate lyase                                                                                                                        | NM_001096.1 | 0.018             | 1.08                                   | 0.91 |
| SULT2A1     | Sulfotransferase family 2A, dehydroepiandrosterone-preferring, member 1                                                                  | AI028152    | 0.001             | 1.07                                   | 0.75 |
| GGPS1       | Geranylgeranyl diphosphate synthase 1                                                                                                    | AA989390    | 0.001             | 1.06                                   | 0.80 |
| HMGCR       | 3-Hydroxy-3-methylglutaryl-coenzyme A reductase                                                                                          | AI032963    | 0.044             | 1.04                                   | 0.90 |
| CHKA        | Choline kinase- $\alpha$                                                                                                                 | AI991328    | 0.044             | 0.96                                   | 0.73 |
| AKR1B10     | Aldoketoreductase family 1, member B10 (aldose reductase)                                                                                | AF044961    | 0.015             | 0.94                                   | 1.24 |
| HEXB        | Hexosaminidase B ( $\beta$ -polypeptide)                                                                                                 | NM_000521.2 | 0.020             | 0.90                                   | 1.04 |
| LIPA        | Lipase A, lysosomal acid, cholesterol esterase                                                                                           | AA988640    | 0.032             | 0.90                                   | 0.97 |
| SCP2        | Sterol carrier protein 2                                                                                                                 | R19294      | 0.045             | 0.86                                   | 0.95 |
| ACAA2       | Acetyl-coenzyme A acyltransferase 2 (mitochondrial 3-oxoacyl-coenzyme A thiolase)                                                        | AW072302    | 0.040             | 0.83                                   | 1.49 |
| IMPA1       | Inositol(myo)-1(or 4)-monophosphatase 1                                                                                                  | NM_005536.2 | 0.012             | 0.79                                   | 1.19 |
| WWOX        | WW domain containing oxidoreductase                                                                                                      | AA970231    | 0.021             | 0.78                                   | 1.19 |
| OSBPL2      | Oxysterol binding protein-like 2                                                                                                         | AI753638    | 0.006             | 0.74                                   | 0.97 |
| COLEC12     | Collectin subfamily member 12                                                                                                            | AA977789    | 0.018             | 0.53                                   | 1.27 |

Genes with  $P \leq 0.05$  that are involved in lipid metabolism that were affected by overexpressing GPI-PLD in HepG2 cells were identified as described in *Patients and Methods*. Identifying data, gene symbol, GenBank, and description were taken from Affymetrix annotations.

result in fatty liver (4). In this report, we demonstrate that GPI-PLD expression is elevated in patients with NAFLD and provide evidence that it may play a role in enhancing *de novo* lipogenesis in liver.

Donnelly *et al.* (3) demonstrated that the primary lipid defect in patients with NAFLD is a 5-fold increase in *de novo* lipogenesis. Consistent with this *in vivo* observation, a recent analysis of fatty acid synthesis and oxidation genes in patients with NAFLD demonstrated an increase in genes involved in *de novo* lipogenesis [acetyl coenzyme A carboxylase (ACC) 1 and 2] and triglyceride synthesis (DGAT1) as well as alterations in genes involved in  $\beta$ -oxidation of fatty acids [carnitine palmitoyltransferase 1a decreased, whereas long-chain acyl-coenzyme A dehydrogenase and long-chain L-3-hydroxyacyl-coenzyme A dehydrogenase (HADH)- $\alpha$  increased] (22). An increase in fatty oxidation genes may be a compensatory effect in response to the increase in *de novo* lipogenesis. The predicted net effect is an accumulation of intracellular fatty acids and triglycerides. Many of these

same genes altered in NASH are similarly affected by overexpressing GPI-PLD *in vitro*. Genes affected by GPI-PLD overexpression that are involved in *de novo* lipogenesis and triglyceride synthesis include ATP citrate lyase (ACLY), ACC2, elongation of very long-chain fatty acids, stearoyl coenzyme-A desaturase (SCD), and DGAT1, whereas those involved in  $\beta$ -oxidation of fatty acids include short-chain HADH, HADH $\alpha$ , and acetyl-coenzyme A acyltransferase 2. These results are expected to result in a net increase in fatty acid synthesis, which may contribute to the increase in serum triglycerides observed when hepatic GPI-PLD expression is increased (11). This raises the possibility that the increase in hepatic GPI-PLD mRNA that occurs in patients with NAFLD may play an active role in the development of fatty liver. Many of these genes (ACC, SCD, ACLY, 3-hydroxy-3-methylglutaryl-coenzyme A reductase) are regulated by sterol-response element binding proteins (SREBP). The SREBP family of transcription factors regulates cholesterol and triglyceride synthesis. It is conceivable that overexpressing

GPI-PLD alters the lipid composition of the endoplasmic reticulum resulting in activation of SREBPs. However, this was not examined in our study because sufficient liver tissue was not available.

In addition to altering genes involved in lipid metabolism, overexpressing GPI-PLD in HepG2 cells had a large effect on global gene expression. More than 100 genes involved in RNA metabolism and regulation of transcription were affected including 20 transcription factors and 18 corepressors/coactivators. Altering that many transcription factors likely results in many downstream effects. In addition, more than 30 growth factors or their receptors were altered including TGF $\beta$ 1 (up 1.74-fold), IL-8 (up 1.6-fold), vascular endothelial growth factor (up 1.2-fold), IGF-I receptor (up 2.4-fold), and fibroblast growth factor receptor 1 (up 1.5-fold). Many of these growth factors have been implicated in the progression of fatty liver to the fibrosis and cirrhosis seen in NASH (23, 24). Clearly, overexpressing GPI-PLD affects many genes involved in a multitude of pathways and biological processes. Using global gene expression makes it difficult to determine which, if any, of these pathways or processes affected by GPI-PLD may contribute to the development of fatty liver and/or NASH. Our observation that liver GPI-PLD mRNA is elevated to the same extent in patients with fatty liver and NASH suggests that GPI-PLD is more related to the former rather than the latter. More direct experiments are needed to determine how and at what point GPI-PLD plays in the development and progression of NAFLD.

Our results are also the first to demonstrate acute regu-

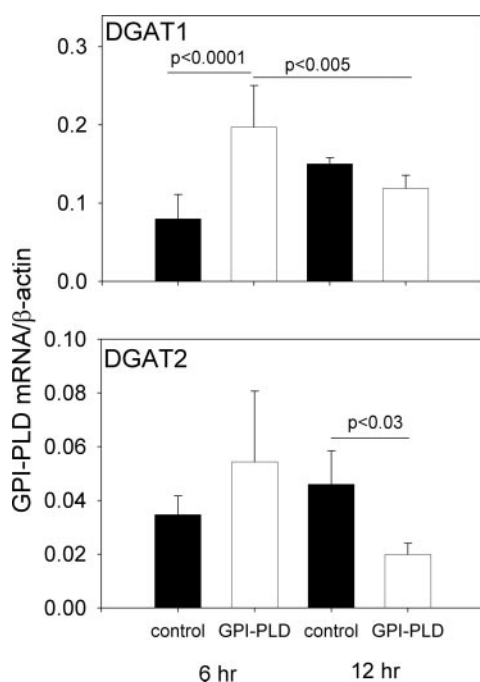

FIG. 2. GPI-PLD increases DGAT1 but not DGAT2 expression in HepG2 cells. HepG2 cells were transduced with AdLacZ or AdGPI-PLD and total RNA extracted after 6 or 12 h as described in *Materials and Methods*. DGAT1 and DGAT2 mRNA levels were determined by Northern blotting and normalized to  $\beta$ -actin mRNA. Results are from three independent experiments.

lation of DGAT1 expression. It is unclear how GPI-PLD activity may regulate DGAT1 and other genes. GPI-PLD-mediated cleavage of GPIs generates phosphatidic acid, which leads to an increase in diacylglycerol and the activation of protein kinase C $\alpha$  (25). In addition, inositol glycans would also be released. Inositol glycans have been postulated to serve as insulin mediators and have been suggested to stimulate *de novo* lipogenesis and triglyceride synthesis (26, 27). Whether these signals are responsible for the effects of GPI-PLD on gene expression is unknown at this time.

Why GPI-PLD expression is increased in NAFLD is unknown. Oxidative stress alters GPI-PLD expression in macrophage cell lines (28, 29). This might explain an alteration in NASH as increased oxidative stress is suggested to mediate the transition from fatty liver to NASH but does not explain the increase in patients with fatty liver. Glucose and insulin regulate GPI-PLD expression in pancreatic islet  $\beta$ -cells (30), raising the possibility that increased expression of hepatic GPI-PLD may be related to serum insulin levels in NAFLD patients. Increased expression of GPI-PLD not only will have effects within the hepatocyte but also will be expected to increase GPI-PLD secretion into the plasma. In mice, serum GPI-PLD is under genetic control (7, 31), and we have found that fasting serum GPI-PLD levels do correlate to levels of hepatic levels of GPI-PLD mRNA (32). However, serum levels of GPI-PLD also appear to be acutely regulated because serum GPI-PLD levels rise and fall during the postprandial state without changes in liver GPI-PLD mRNA levels (11). Hence, the increased serum levels of GPI-PLD in NASH patients may result from a combination of increased hepatic expression as well as the altered lipoprotein metabolism in the plasma compartment that occurs with insulin resistance.

Limitations of this study include use of stored samples [although serum GPI-PLD levels are stable frozen for at least 3 yr (Deeg, M. A., unpublished observation)], no data with respect to actual protein levels in the liver, and not being able to have serum and hepatic samples from the same cohort. Hence, we were not able to test whether there was a significant correlation between hepatic GPI-PLD mRNA and serum or hepatic GPI-PLD protein. In addition, overexpressing GPI-PLD in HepG2 cells may not entirely reflect the changes in gene expression that would occur in normal hepatocytes. In addition, the changes in gene expression after 6–12 h of overexpressing GPI-PLD may be different from that which occurs after prolonged increased expression of GPI-PLD. Nonetheless, these studies have yielded important preliminary findings to support GPI-PLD as a target for further evaluation.

In summary, patients with NAFLD have elevated serum levels and hepatic expression of GPI-PLD. Because increased expression of hepatic GPI-PLD is associated with increases in serum triglycerides and increased expression of *de novo* lipogenesis genes, GPI-PLD may play an active role in the pathogenesis of NAFLD or its metabolic features and warrants further investigation.

#### Acknowledgments

We thank Rosario Bowen for excellent technical assistance and Drs. David Crabb and Steve Miller for helpful comments.

Received January 13, 2006. Accepted March 28, 2006.

Address all correspondence and requests for reprints to: Mark Deeg, M.D., Ph.D., Division of Endocrinology and Metabolism, Indiana University School of Medicine, 1481 West 10th Street, Indianapolis, Indiana 46202. E-mail: mdeeg@iupui.edu.

This work was supported by funds from a Veterans Affairs Merit Review (to M.A.D.), K24 DK 072101 (to N.C.), and RR00750 (Indiana University General Clinical Research Center). Microarray studies were carried out in the Center for Medical Genomics at Indiana University School of Medicine, which is supported in part by grants from the Indiana 21st Century Research and Technology Fund and the Indiana Genomics Initiative of Indiana University (supported in part by the Lilly Endowment, Inc.).

## References

- den Boer M, Voshol PJ, Kuipers F, Havekes LM, Romijn JA 2004 Hepatic steatosis: a mediator of the metabolic syndrome. Lessons from animal models. *Arterioscler Thromb Vasc Biol* 24:644–649
- Browning JD, Horton JD 2004 Molecular mediators of hepatic steatosis and liver injury. *J Clin Invest* 114:147–152
- Donnelly KL, Smith CI, Schwarzenberg SJ, Jessurun J, Boldt MD, Parks EJ 2005 Sources of fatty acids stored in liver and secreted via lipoproteins in patients with nonalcoholic fatty liver disease. *J Clin Invest* 115:1343–1351
- Bugianesi E, McCullough AJ, Marchesini G 2005 Insulin resistance: a metabolic pathway to chronic liver disease. *Hepatology* 42:987–1000
- Kurtz TA, Fineberg NS, Considine RV, Deeg MA 2004 Insulin resistance is associated with increased serum levels of glycosylphosphatidylinositol-specific phospholipase D. *Metabolism* 53:138–139
- Stadelmann B, Zurbiggen A, Brodbeck U 1993 Distribution of glycosylphosphatidylinositol-specific phospholipase D mRNA in bovine tissue sections. *Cell Tissue Res* 274:547–552
- LeBoeuf RC, Caldwell M, Guo Y, Metz C, Davitz MA, Olson LK, Deeg MA 1998 Mouse glycosylphosphatidylinositol-specific phospholipase D (Gpld1) characterization. *Mamm Genome* 9:710–714
- Hoener MC, Brodbeck U 1992 Phosphatidylinositol-glycan-specific phospholipase D is an amphiphilic glycoprotein that in serum is associated with high-density lipoproteins. *Eur J Biochem* 206:747–757
- Hoener MC, Golli R, Brodbeck U 1993 Glycosyl-phosphatidylinositol-specific phospholipase D: interaction with and stimulation by apolipoprotein A-I. *FEBS Lett* 327:203–206
- Deeg MA, Bierman EL, Cheung MC 2001 GPI-specific phospholipase D associates with an apoA-I- and apoA-IV-containing complex. *J Lipid Res* 42:442–451
- Raikwar NS, Cho WK, Bowen RF, Deeg MA 2006 Glycosylphosphatidylinositol-specific phospholipase D influences triglyceride-rich lipoprotein metabolism. *Am J Physiol Endocrinol Metab* 290:E463–E470
- Musso G, Gambino R, De Micheli F, Cassader M, Rizzetto M, Durazzo M, Faga E, Silli B, Pagano G 2003 Dietary habits and their relations to insulin resistance and postprandial lipemia in nonalcoholic steatohepatitis. *Hepatology* 37:909–916
- Chalasan N, Crabb DW, Cummings OW, Kwo PY, Asghar A, Pandya PK, Considine RV 2003 Does leptin play a role in the pathogenesis of human nonalcoholic steatohepatitis? *Am J Gastroenterol* 98:2771–2776
- Chalasan N, Deeg MA, Crabb DW 2004 Systemic levels of lipid peroxidation and its metabolic and dietary correlates in patients with nonalcoholic steatohepatitis. *Am J Gastroenterol* 99:1497–1502
- Chalasan N, Deeg MA, Persohn S, Crabb DW 2003 Metabolic and anthropometric evaluation of insulin resistance in nondiabetic patients with nonalcoholic steatohepatitis. *Am J Gastroenterol* 98:1849–1855
- Chalasan N, Gorski JC, Asghar MS, Asghar A, Foresman B, Hall SD, Crabb DW 2003 Hepatic cytochrome P450 2E1 activity in nondiabetic patients with nonalcoholic steatohepatitis. *Hepatology* 37:544–550
- Vuppalachchi R, Marri S, Kolwankar D, Considine RV, Chalasan N 2005 Is adiponectin involved in the pathogenesis of nonalcoholic steatohepatitis? A preliminary human study. *J Clin Gastroenterol* 39:237–242
- Mather KJ, Hunt AE, Steinberg HO, Paradisi G, Hook G, Katz A, Quon MJ, Baron AD 2001 Repeatability characteristics of simple indices of insulin resistance: implications for research applications. *J Clin Endocrinol Metab* 86:5457–5464
- Raikwar NS, Bowen RF, Deeg MA 2005 Mutating His29, His125, His133 or His158 abolishes glycosylphosphatidylinositol-specific phospholipase D catalytic activity. *Biochem J* 391:285–289
- McClintick JN, Jerome RE, Nicholson CR, Crabb DW, Edenberg HJ 2003 Reproducibility of oligonucleotide arrays using small samples. *BMC Genomics* 4:4
- Raymond FD, Fortunato G, Moss DW, Castaldo G, Salvatore F, Impallomeni M 1994 Inositol-specific phospholipase D activity in health and disease. *Clin Sci (Colch)* 86:447–451
- Nakamuta M, Kohjima M, Morizono S, Kotoh K, Yoshimoto T, Miyagi I, Enjoji M 2005 Evaluation of fatty acid metabolism-related gene expression in nonalcoholic fatty liver disease. *Int J Mol Med* 16:631–635
- Starke P, Sempoux C, Leclercq I, Herin M, Deby C, Desager JP, Horsmans Y 2003 Oxidative stress, KLF6 and transforming growth factor- $\beta$  up-regulation differentiate non-alcoholic steatohepatitis progressing to fibrosis from uncomplicated steatosis in rats. *J Hepatol* 39:538–546
- Smedile A, Bugianesi E 2005 Steatosis and hepatocellular carcinoma risk. *Eur Rev Med Pharmacol Sci* 9:291–293
- Tsujioka H, Takami N, Misumi Y, Ikehara Y 1999 Intracellular cleavage of glycosylphosphatidylinositol by phospholipase D induces activation of protein kinase C $\alpha$ . *Biochem J* 342:449–455
- Muller G, Wied S, Crecelius A, Kessler A, Eckel J 1997 Phosphoinositol-glycan-peptides from yeast potentially induce metabolic insulin actions in isolated rat adipocytes, cardiomyocytes, and diaphragms. *Endocrinology* 138:3459–3475
- Suzuki S, Sugawara K, Satoh Y, Toyota T 1991 Insulin stimulates the generation of two putative insulin mediators, inositol-glycan and diacylglycerol in BC3H-1 myocytes. *J Biol Chem* 266:8115–8121
- Du X, Low MG 2001 Down-regulation of glycosylphosphatidylinositol-specific phospholipase D induced by lipopolysaccharide and oxidative stress in the murine monocyte-macrophage cell line RAW 264.7. *Infect Immun* 69:3214–3223
- O'Brien KD, Pineda C, Chiu WS, Bowen R, Deeg MA 1999 Glycosylphosphatidylinositol-specific phospholipase D is expressed by macrophages in human atherosclerosis and colocalizes with oxidation epitopes. *Circulation* 99:2876–2882
- Bowen RF, Raikwar NS, Olson LK, Deeg MA 2001 Glucose and insulin regulate GPI-specific phospholipase D expression in islet  $\beta$  cells. *Metabolism* 50:1489–1492
- Flores-Borja F, Kieszkievicz J, Church V, Francis-West PH, Schofield J, Rademacher TW, Lund T 2004 Genetic regulation of mouse glycosylphosphatidylinositol-phospholipase D. *Biochimie (Paris)* 86:275–282
- Deeg MA, Bowen RF, Williams MD, Olson LK, Kirk EA, LeBoeuf RC 2001 Increased expression of GPI-specific phospholipase D in mouse models of type 1 diabetes. *Am J Physiol Endocrinol Metab* 281:E147–E154

JCEM is published monthly by The Endocrine Society (<http://www.endo-society.org>), the foremost professional society serving the endocrine community.
